# Supplementary material for: Application of an Integrative Computational Framework in Trancriptomic Data of Atherosclerotic Mice Suggests Numerous Molecular Players
Source: Adv Bioinformatics. 2012 Nov 6;2012:453513. doi: 10.1155/2012/453513 (PMC3502768; doi:10.1155/2012/453513)
Supplement: Supplementary file 1 — Supplementary Table 1: List of significantly differentiated probesets. ANOVA analysis between fold changes in expression of ApoE knockout and wild type mice, in three different ages, yielded a list of 1033 significantly differentiated probesets. Supplementary Table 2: Kegg pathways based analysis. The list of 852 significantly altered genes was submitted to StRAnGER analysis, elucidating over-represented Kegg terms. Kegg term P value represents the hypergeometric test P value score for each Kegg term. Enrichment represents the ratio of the number of times a Kegg term occurs in the 852 gene list to the number of times this term exists in the list of the Affymetrix 430 2.0 array. [file 453513.f1.xlsx]

## Sheet: Sup. Table 1 List of probesets
GeneID	Gene Symbol	p-value	Fold ChangeKO/WT 6 weeks	Fold ChangeKO/WT 32 weeks	Fold ChangeKO/WT 78 weeks
1429344_at	_9130022E09	0.00227517	1.07	0.13	-1.21
1453141_at	0610009L18Rik	0.00287178	0.08	-0.17	-1.12
1421049_at	0610009O20Rik	0.0031075	0.23	-0.65	1.13
1423829_at	0910001A06Rik	0.00093526	-0.05	0.31	1.62
1419376_at	1110018M03Rik	0.00102807	-0.18	-0.69	-1.35
1428675_at	1110049F12Rik	0.000288404	-1.29	0.53	1.2
1435987_x_at	1110059G02Rik	3.0386e-05	0.38	-0.48	-1.6
1436203_a_at	1110059G02Rik	0.0023256	0.62	-0.49	-1.83
1436204_at	1110059G02Rik	0.000942368	0.64	-0.94	-2.44
1438288_x_at	1110059G02Rik	0.000316625	0.53	-0.56	-1.32
1439543_at	1110064A23Rik	0.0059455	-0.06	-0.35	-1.42
1418003_at	1190002H23Rik	0.00151511	0.01	-0.54	1.24
1424524_at	1200002N14Rik	0.00334705	-0.02	0.74	1.22
1448557_at	1200015N20Rik	0.00458012	-0.02	-0.4	-1.01
1423261_at	1500015O10Rik	0.000115611	-1.26	2.28	1.91
1460049_s_at	1500015O10Rik	0.000158439	-1.74	1.7	2.06
1432494_a_at	1700019E19Rik	0.000141835	0.18	-0.47	-1
1453483_at	1700023E05Rik	0.00217205	1.04	-1.47	-0.39
1428593_at	1700029F09Rik	0.000741798	-1.14	-0.11	0.62
1437087_at	2210408K08Rik	0.00191024	-0.04	0.8	1.07
1444727_at	2310042D19Rik	0.00698282	0.82	-0.23	-1.75
1424913_at	2310044G17Rik	0.00722455	-0.04	0.33	1.65
1428990_at	2310047K21Rik	0.000686093	0.68	-0.6	1.34
1448718_at	2400001E08Rik	0.000388527	-0.02	0.2	1.29
1434233_at	2610030H06Rik	0.00149124	-0.28	0.57	2.39
1428483_a_at	2610039C10Rik	0.00208617	-0.31	0.51	1.15
1459902_at	2700007P21Rik	0.00086491	-0.28	0.67	1.17
1424983_a_at	2700078E11Rik	1.64956e-05	-0.12	0.62	1.76
1455170_at	2810001G20Rik	0.00263421	1.04	-0.44	0.25
1439565_at	2810002O09Rik	0.0052117	0.12	-0.5	-1.05
1436091_at	2810022L02Rik	0.00248076	0.26	-0.55	-1.46
1455566_s_at	2810022L02Rik	0.00629309	0.13	-0.47	-1.41
1419153_at	2810417H13Rik	0.00559979	-0.43	0.23	1.98
1429625_at	2900054C01Rik	0.00167202	0.05	-0.88	-1.66
1429703_at	2900072G11Rik	0.00375249	0.2	-0.51	-1.04
1416892_s_at	3110001A13Rik	0.00827197	0.17	0.83	1.23
1456120_at	3110001I20Rik	0.00238336	-0.14	0.74	-1.03
1448678_at	3110048E14Rik	0.00163435	0.11	-0.06	-1.01
1435672_at	3830612M24	0.000992321	-0.33	0.64	1.13
1422628_at	4632417K18Rik	0.00705849	0.1	0.97	2.02
1429332_at	4632427E13Rik	0.0065224	0.05	1.13	-0.81
1416619_at	4632428N05Rik	0.00163611	0.17	1.06	1.96
1424832_at	4732429D16Rik	3.78667e-05	-0.16	1.03	1.75
1441285_at	4833426J09Rik	0.00369304	0.24	-1.15	-0.69
1432959_at	4930447I22Rik	0.000224823	-0.00224113	1.11	-1.11
1434048_at	4930471M23Rik	0.00277162	0.02	1.01	1.46
1429055_at	4930506M07Rik	0.000301098	0.11	1.22	2.18
1454048_a_at	4931408A02Rik	0.00730962	0.38	0.01	-1.05
1453145_at	4933439C20Rik	3.38914e-05	0.58	2.27	0.61
1435745_at	5031439G07Rik	0.00149999	-0.04	0.67	1.34
1456210_at	5430407P10Rik	0.00153179	0.17	0.03	-1.23
1426987_at	5430417L22Rik	9.81861e-05	0.46	-0.36	-1.28
1424987_at	5430435G22Rik	0.000121541	-0.04	1.97	2.6
1428948_at	5730414M22Rik	0.00232925	0.29	-0.46	-1.34
1416634_at	5730536A07Rik	0.00247699	0.04	0.38	1.01
1432997_at	5830462P14Rik	0.00583031	0.23	0.4	1.6
1440934_at	6230409E13Rik	0.000274184	0.98	-0.2	-1
1441972_at	6230424C14Rik	0.000493388	0.44	-0.47	-1.05
1453188_at	6230424C14Rik	0.00109938	0.27	-0.49	-1
1429146_at	6620401M08Rik	0.000404649	0.26	-0.18	-1.22
1433184_at	6720477C19Rik	0.00352471	0.55	-0.13	-1.06
1428829_at	6820401H01Rik	0.00117662	-0.34	0.38	1.08
1452761_a_at	8430436O14Rik	0.00396572	0.15	-0.37	-1.05
1439689_at	9030224M15Rik	0.00670454	-0.14	-0.3	-1.44
1433289_at	9530078B04Rik	0.00448367	0.1	0.00785295	-1.41
1428909_at	A130040M12Rik	0.00301258	-0.04	0.29	1.41
1447948_at	A430107O13Rik	0.00550544	-0.3	-0.07	-1.34
1459878_a_at	A430107O13Rik	0.00544086	-0.51	0.48	-1
1440884_s_at	A530047J11Rik	3.40584e-05	0.15	-0.34	-1.23
1455554_at	A830039N20Rik	0.00104556	0.19	-0.58	-1.32
1421839_at	Abca1	0.00281723	0.7	2.21	2.61
1421840_at	Abca1	0.00696685	0.78	1.26	1.9
1450392_at	Abca1	0.00567059	0.9	2.72	2.76
1438431_at	Abcd2	0.000952624	-0.46	-0.56	2.12
1453367_a_at	Abhd12	0.000425111	-0.18	1.16	1.7
1456658_at	Acta2	0.00611259	0.03	-0.71	-2.02
1421858_at	Adam17	0.00619274	-0.22	0.27	1.07
1435990_at	Adamts2	0.000458612	-0.12	0.3	1.39
1455296_at	Adcy5	0.00257358	0.15	-0.45	-1.12
1448318_at	Adfp	0.00143158	-0.1	0.69	2.16
1450110_at	Adh7	0.00779056	-0.44	0.16	-1.38
1435495_at	Adora1	0.00653871	-1.28	-0.4	0.82
1433600_at	Adra2a	0.00576115	0.15	-0.04	-1.26
1451992_at	Adrbk1	0.00200473	0.16	0.5	1.1
1459247_at	Agbl3	0.0044312	1.56	-0.6	0.16
1422631_at	Ahr	9.21288e-05	-0.47	1.77	2.81
1452599_s_at	AI413582	0.000123996	-0.67	1.08	2.06
1444537_at	AI429363	5.74665e-05	-0.1	0.5	1.9
1456494_a_at	AI451617	0.00119064	0.02	1.38	1.23
1433465_a_at	AI467606	0.00491719	0.02	0.68	1.23
1455161_at	AI504432	0.00183994	-0.03	1.21	2.61
1457035_at	AI607873	3.04829e-05	-0.54	1.92	3.62
1434067_at	AI662270	0.00333437	0.23	1.67	2.59
1441829_s_at	Akap10	0.00160019	0.08	0.42	1.08
1419706_a_at	Akap12	0.00436752	-0.19	-0.03	-1.22
1440859_at	Akap6	0.00169053	0.1	-0.52	-1.65
1426300_at	Alcam	0.00125834	-0.09	1.12	2.08
1426301_at	Alcam	0.000273217	-0.3	0.81	2
1437466_at	Alcam	0.000674087	-0.13	0.68	1.56
1437467_at	Alcam	0.000326247	-0.07	0.96	1.61
1457155_at	Aldh2	0.00375964	0.22	-0.43	-1.22
1431077_at	Alpi	0.000695976	0.97	-0.28	-1.61
1434601_at	Amigo2	0.000671635	-0.27	-0.46	-1.66
1420991_at	Ankrd1	0.00377306	0.44	-0.15	1.02
1434630_at	Ankrd28	0.00266108	0.03	0.13	1.28
1454736_at	Ankrd57	0.00183166	0.2	0.19	1.22
1415818_at	Anxa6	0.00692902	-0.03	-0.16	-1.01
1449396_at	Aoc3	0.00340756	0.08	-0.04	-1.12
1421726_at	Ap4b1	0.0026553	0.24	-1.33	0.2
1418382_at	Apcdd1	0.00727866	0.08	-0.63	-1.33
1449070_x_at	Apcdd1	2.45034e-05	0.05	-0.78	-1.63
1424980_s_at	Aph1a	0.000635284	-0.37	0.00504221	1.22
1418849_x_at	Aqp7	0.0023328	0.11	-0.68	1.2
1435959_at	Arhgap15	0.00460089	0.23	0.5	1.34
1426454_at	Arhgdib	0.000234324	-0.22	0.91	1.25
1419938_s_at	Arhgef17	0.0032119	0.17	-0.22	-1.08
1431429_a_at	Arl4a	0.00466679	-0.34	-0.48	-1.04
1435092_at	Arl4a	0.000829882	-0.1	-0.4	-1.26
1454788_at	Arl4c	9.04178e-05	0.08	1.09	2.21
1448279_at	Arpc3	0.00372497	-0.02	0.47	1.06
1426239_s_at	Arrb2	0.00120734	0.25	1.16	2.23
1427002_s_at	Arsg	0.00726958	-1.05	0.21	1.27
1452474_a_at	Art3	0.00032578	0.37	-0.35	-1.68
1449356_at	Asb5	0.00524391	0.27	-0.31	-1.72
1433966_x_at	Asns	8.94295e-06	1.08	0.37	2.31
1451095_at	Asns	0.000868582	0.17	0.18	1.27
1430656_a_at	Asnsd1	0.00190397	0.11	0.34	1.13
1436174_at	Atad2	0.00104456	-0.27	0.15	1.02
1428340_s_at	Atp13a2	0.000428345	-0.53	1.06	1.89
1427465_at	Atp1a2	0.00376058	0.05	-0.42	-1.14
1434893_at	Atp1a2	0.00287753	0.31	-0.34	-1.42
1416551_at	Atp2a2	0.00052702	-0.01	-0.29	-1.05
1427251_at	Atp2a2	0.000267401	0.04	-0.39	-1.24
1428937_at	Atp2b1	7.37565e-05	-0.07	0.4	1.59
1452969_at	Atp2b1	0.00805432	-0.01	0.55	1.45
1425227_a_at	Atp6v0a1	0.000464158	0.45	2.6	0.39
1448211_at	Atp6v0e2	0.00461334	-0.28	0.44	-1.58
1415814_at	Atp6v1b2	0.00145696	-0.25	1.55	2.22
1419883_s_at	Atp6v1b2	0.000703417	-0.02	1.4	1.81
1419544_at	Atp6v1c1	0.00408504	0.09	0.59	1.08
1419545_a_at	Atp6v1c1	0.00373347	-0.11	0.64	1.08
1419546_at	Atp6v1c1	0.00225184	-0.21	0.74	1.03
1433935_at	AU020206	0.000381925	-0.13	0.55	1.48
1454838_s_at	AW548124	0.000143435	0.26	-0.12	-1.1
1460411_s_at	AW548124	0.000252097	0.29	-0.33	-1.35
1438989_s_at	B130021B11Rik	0.00164261	-0.23	-0.52	-2.23
1455033_at	B430201A12Rik	0.00520802	0.03	0.71	1.24
1440586_at	B430203I24Rik	0.00234904	-0.31	0.52	2.12
1433617_s_at	B4galt5	0.000317844	0.11	4.07	2.78
1428572_at	Basp1	0.000690218	0.19	2.76	3.12
1433599_at	Baz1a	0.00785568	0.23	0.78	2.01
1455425_at	BB001228	0.0020192	0.26	-0.42	-1.89
1445274_at	BC062127	0.00166671	0.41	-0.02	-1.02
1434069_at	BC067047	0.00418326	-0.55	0.81	1.85
1435448_at	Bcl2l11	0.00117888	0.36	0.8	1.59
1428209_at	Bex4	0.000467111	-0.01	-0.03	-1.95
1429273_at	Bmper	0.000624496	-0.05	0.56	1.71
1417040_a_at	Bok	0.00154276	-0.09	0.21	1.89
1447940_a_at	Braf	0.00044442	-0.04	0.03	-1.33
1424921_at	Brd4	0.000594223	0.18	0.79	1.49
1435541_at	Btc	0.000935134	0.11	-0.35	-1.35
1425078_x_at	C130026I21Rik	0.000437783	-0.36	0.51	2.17
1434780_at	C130038G02Rik	0.0040047	0.06	-0.33	-1.34
1417381_at	C1qa	1.40278e-05	-0.08	1.98	2.18
1417063_at	C1qb	0.000259448	-0.75	2.67	2.85
1434366_x_at	C1qb	0.000900631	-0.02	1.99	2.39
1437726_x_at	C1qb	0.000122729	0.08	2.19	2.04
1449401_at	C1qc	1.95185e-05	-0.22	2.22	2.25
1416051_at	C2	0.000664757	-0.81	1.02	-0.03
1442082_at	C3ar1	4.6128e-05	0.06	3.45	3.95
1418021_at	C4b	0.00177124	0.23	1.2	1.74
1439902_at	C5ar1	0.00142305	-0.33	1.45	1.63
1457092_at	C630007B19Rik	0.00354267	0.6	-0.75	-1.52
1417378_at	Cadm1	0.000412667	-0.57	1.5	2.01
1438643_at	Camk1d	0.00606434	0.3	0.63	1.77
1423222_at	Cap2	0.00756844	-0.02	-0.92	-1.62
1450910_at	Cap2	0.000457537	0.16	-0.86	-1.61
1450355_a_at	Capg	0.00110498	0.13	1.62	2.19
1421308_at	Car13	0.000177195	-0.81	0.18	1.97
1458469_at	Cblb	0.000743612	0.2	0.34	1.36
1418509_at	Cbr2	0.00389717	0.05	-0.19	-1.04
1418778_at	Ccdc109b	0.00128266	-0.03	1.27	1.36
1427157_at	Ccdc85a	0.004231	-0.37	-0.43	-1.61
1449277_at	Ccl19	0.00113038	-0.71	1.07	1.64
1417266_at	Ccl6	0.00180946	-0.14	2.32	2.3
1420249_s_at	Ccl6	0.000898392	-0.2	2.17	2.17
1421228_at	Ccl7	0.000997689	-0.98	1.59	4.42
1419684_at	Ccl8	0.000192993	0.33	2.92	3.01
1417936_at	Ccl9	0.000788703	-0.46	1.74	2.19
1448698_at	Ccnd1	0.00347214	-0.01	0.67	1.07
1424727_at	Ccr5	0.0021257	0.28	3.34	2.76
1425658_at	Cd109	2.30472e-05	0.07	0.35	1.31
1417268_at	Cd14	0.000429796	-0.14	1.52	2.44
1417599_at	Cd276	5.68785e-05	-0.34	0.86	2.62
1420906_at	Cd2ap	0.000754844	-0.48	0.61	1.1
1445882_at	Cd300lb	7.68118e-05	-0.46	2.83	2.87
1423166_at	Cd36	7.93563e-05	0.19	0.29	2.58
1450883_a_at	Cd36	0.000325638	0.26	0.22	1.8
1423760_at	Cd44	0.00242859	0.15	1.46	1.63
1434376_at	Cd44	0.000209096	-0.09	1.17	1.62
1427301_at	Cd48	0.000425654	-0.06	2.45	3.61
1460218_at	Cd52	0.0019271	0.78	2.56	3.02
1448617_at	Cd53	0.000314673	-0.1	2.12	2.65
1449164_at	Cd68	2.55167e-05	-0.22	3.14	3.94
1428735_at	Cd69	0.00695243	0.37	0.87	1.68
1425519_a_at	Cd74	0.00215057	0.29	1.56	1.43
1416401_at	Cd82	5.82594e-05	-0.2	0.56	1.07
1422875_at	Cd84	4.90706e-05	0.29	4	3.81
1419589_at	Cd93	0.000942786	-0.2	0.79	1.12
1456046_at	Cd93	0.000721107	-0.2	1.07	1.02
1418712_at	Cdc42ep5	0.0082515	-0.16	-0.26	-1.09
1435220_s_at	Cdc42se2	5.16905e-05	-0.13	0.76	1.76
1448000_at	Cdca3	0.00669883	-0.16	-0.14	1.09
1418815_at	Cdh2	0.00384461	0.21	0.81	1.69
1456397_at	Cdh4	0.00629737	0.09	-0.53	-2.07
1455287_at	Cdk6	0.000260242	-0.35	0.24	1.37
1424143_a_at	Cdt1	0.00551252	-0.03	0.98	1.16
1418982_at	Cebpa	0.000512497	-0.3	0.21	1.77
1419833_s_at	Centd3	0.00368343	-0.07	0.51	1.11
1427384_at	Chd6	0.000331322	-0.03	-0.46	-1.01
1435190_at	Chl1	0.00126206	-0.36	1.78	2.46
1431176_at	Chmp4c	0.0065246	0.06	-0.43	-1.86
1449887_at	Chmp4c	0.00215735	-0.04	-0.33	-1.82
1456722_at	Chrdl1	0.00380672	-0.21	0.04	-1.26
1428902_at	Chst11	0.00137231	-0.02	1.05	1.85
1417091_at	Chuk	0.000941078	0.08	0.15	1.14
1421210_at	Ciita	0.00380497	-0.09	-0.44	1.48
1424495_a_at	Cklf	0.000464403	-0.52	0.91	1.68
1425860_x_at	Cklf	0.00105748	-0.27	0.45	1.27
1417457_at	Cks2	0.00250555	-0.69	1.01	1.03
1417458_s_at	Cks2	0.000191578	-0.55	0.28	1.36
1417852_x_at	Clca1	0.00238507	0.2	1.78	1.24
1452702_at	Clcn7	0.00201975	0.04	0.49	1.12
1430237_at	Cldn22	0.00798794	0.21	-0.45	-1.47
1429954_at	Clec4a3	0.000334321	-0.24	2.06	2.42
1420699_at	Clec7a	0.00015727	0.15	3.52	3.86
1456873_at	Clic5	0.00439762	-1.28	-0.17	0.08
1459992_x_at	Cln8	0.000329813	0.37	0.85	1.71
1448316_at	Cmtm3	0.00424255	-0.08	1.16	0.95
1460253_at	Cmtm7	0.00145995	-0.24	0.52	2.5
1448263_a_at	Cndp2	0.00181644	-0.19	1.2	1.38
1460177_at	Cndp2	0.000515698	-0.09	1.2	1.75
1421698_a_at	Col19a1	0.0001079	0.41	-0.4	-2.25
1456953_at	Col19a1	0.000934153	0.01	-0.68	-2.65
1423669_at	Col1a1	0.000105911	0.02	0.57	1.01
1440911_at	Col23a1	0.00207341	-0.56	1.61	0.54
1427884_at	Col3a1	8.35526e-05	-0.08	0.74	1.03
1450224_at	Col4a3	0.00713623	-0.04	-0.31	-1.08
1440250_at	Col4a4	0.00295268	0.32	-0.39	-1.74
1425475_at	Col4a5	0.00093638	0.1	-0.12	-1.05
1421006_at	Col4a6	0.0047674	0.05	-0.34	-1.36
1450625_at	Col5a2	0.000174539	-0.16	0.66	1.15
1447819_x_at	Col8a1	0.000607374	0.01	1.72	2.38
1455627_at	Col8a1	2.3077e-05	0.7	2.94	2.53
1428155_at	Commd9	0.00690833	-0.16	1.63	0.28
1455269_a_at	Coro1a	0.000881606	0.52	2.61	2.51
1448351_at	Coro1b	0.00302769	-0.21	0.6	1.21
1437146_x_at	Coro7	0.00168136	0.04	0.65	1.13
1436838_x_at	Cotl1	1.65214e-05	0.23	3.15	3.52
1417494_a_at	Cp	0.00495192	0.02	1.07	1.15
1417495_x_at	Cp	0.00332835	0.07	0.98	1.36
1455393_at	Cp	0.000403714	-0.08	1.11	1.68
1434272_at	Cpeb2	0.000512472	-0.35	0.29	1.06
1415947_at	Creg1	0.00577162	0.000457621	1.04	1.37
1452754_at	Creld2	0.00295976	-0.04	-0.07	1.23
1422012_at	Crhr2	0.00515712	0.22	-0.18	-1.26
1419873_s_at	Csf1r	0.00122283	0.12	1.12	1.65
1423593_a_at	Csf1r	0.0028844	-0.07	0.88	1.57
1420703_at	Csf2ra	0.000573108	0.13	2.73	3.17
1423341_at	Cspg4	0.00383161	0.35	-0.35	-1.07
1452968_at	Cthrc1	2.54136e-06	-0.52	1.96	2.25
1448128_at	Ctsa	0.0030601	-0.03	0.65	1.21
1417491_at	Ctsb	0.00114769	-0.12	1	1.68
1417492_at	Ctsb	0.000393054	-0.13	1.43	1.92
1416382_at	Ctsc	0.000621032	0.01	0.86	1.17
1448118_a_at	Ctsd	0.000430492	-0.00507623	0.79	1.03
1450652_at	Ctsk	0.000299364	-0.26	1.32	2.86
1448591_at	Ctss	2.78197e-06	0.15	2.92	2.71
1417868_a_at	Ctsz	0.000106619	-0.2	0.63	1.04
1417869_s_at	Ctsz	0.000615586	0.03	1.08	1.92
1417870_x_at	Ctsz	0.00108	-0.2	1.11	1.59
1415803_at	Cx3cl1	0.00197155	0.18	1.71	1.87
1457644_s_at	Cxcl1	0.000985815	-0.46	1.77	2.66
1417574_at	Cxcl12	0.000598693	-0.34	1.1	1.95
1449195_s_at	Cxcl16	8.1876e-05	-0.56	3.18	3.56
1448710_at	Cxcr4	0.00513659	-0.13	2.96	4.17
1431469_a_at	Cxxc5	0.00280889	1	0.48	-0.82
1454268_a_at	Cyba	0.000960845	-0.07	1.28	1.38
1454895_at	Cybasc3	0.00162638	-1.11	0.12	1.52
1436778_at	Cybb	0.000117602	-0.19	2.17	2.42
1436779_at	Cybb	0.000271623	-0.09	1.69	2.37
1428347_at	Cyfip2	0.00549778	0.53	1.01	1.55
1421074_at	Cyp7b1	0.0013579	-0.44	1.51	2.24
1435697_a_at	Cytip	0.000739513	0.4	1.34	2.48
1457539_at	D10Ertd709e	0.00687559	-0.06	0.75	1.29
1454806_at	D12Ertd553e	0.0026527	0.36	1.07	2.64
1439771_s_at	D13Ertd608e	0.000676232	1.26	-0.25	0.19
1445999_at	D19Ertd132e	0.00312654	1.08	0.16	-0.39
1436293_x_at	D1Ertd471e	0.000190813	0.21	1.66	3.12
1417471_s_at	D1Ertd622e	0.00428692	0.21	0.27	1.06
1458934_at	D5Ertd505e	0.00370357	0.53	-0.45	1.37
1455087_at	D7Ertd715e	0.00568725	0.05	-0.2	-1.48
1417937_at	Dact1	2.41411e-05	0.07	-0.01	-1.07
1451970_at	Daglb	0.00299266	0.04	0.93	1.4
1451453_at	Dapk2	0.00202607	0.49	-0.55	-1.5
1439012_a_at	Dck	0.000496843	-0.16	1.03	1.88
1449176_a_at	Dck	0.00272427	-0.04	0.95	1.36
1424271_at	Dclk1	0.00111215	-0.7	1.25	1.45
1448368_at	Dctn6	0.00550157	-0.08	-0.36	-1.02
1454995_at	Ddah1	0.000204878	-0.61	1.18	1.44
1436181_at	Ddef2	0.00533912	0.21	-0.17	-1.29
1438168_x_at	Ddx39	0.00413496	-0.03	0.56	1.21
1455361_at	Dgkb	0.000794431	0.22	0.03	-1.02
1425617_at	Dhx9	0.000578464	-0.58	1.16	0.39
1417307_at	Dmd	0.00473111	0.12	-0.32	-1.18
1443315_at	Dmd	0.000596588	0.36	-0.91	-2.13
1434944_at	Dmpk	0.0045537	0.38	-0.18	-1.23
1435505_at	Dmwd	0.000451594	-0.04	-0.71	-1.04
1452210_at	Dna2	0.000943351	-0.3	0.89	1.59
1423151_at	Dnajb11	0.0014097	-0.47	0.29	1.66
1420501_at	Dnajc1	0.00155401	-1.79	1.53	1.41
1417441_at	Dnajc12	0.00595636	-0.64	1.18	0.13
1430718_s_at	Dnajc24	0.00255245	-0.02	0.31	1.29
1429173_at	Dnase1l1	0.000316686	-0.18	1.08	1.58
1456379_x_at	Dner	0.00105603	-0.6	0.15	-2.34
1450931_at	Dock9	0.000888812	0.26	0.06	-1.02
1426739_at	Donson	0.000636521	0.42	0.15	1.93
1429768_at	Dtna	0.00778874	0.07	-0.51	-1.12
1455050_at	E130203B14Rik	0.00551506	-0.2	-0.35	-1.05
1443869_at	E430028B21Rik	0.00745634	-0.55	0.3	1.8
1422411_s_at	Ear3	0.00123681	0.53	1.96	1.55
1423358_at	Ece2	0.00331975	-0.16	0.67	1.84
1423695_at	Edem2	0.00238627	-0.15	0.18	1.61
1433474_at	Edil3	0.00476006	-1.07	0.78	1.7
1448507_at	Efhd1	0.00168815	0.11	-0.24	-1.34
1442806_at	EG435601	0.000894031	0.21	-0.47	-1.46
1425238_at	EG625603	0.00218267	0.27	-0.73	1.04
1444177_at	EG626058	0.00444495	-0.03	1	2.24
1455065_x_at	EG667410	0.000610667	-0.48	1.02	1.44
1437071_at	Eif1ay	0.00650564	0.04	-0.24	-1.32
1440866_at	Eif2ak2	0.000445948	0.11	1.1	0.22
1435803_a_at	Eif4e2	0.00068155	-0.28	0.04	1.11
1438686_at	Eif4g1	0.00446187	0.1	0.1	-1.24
1452858_at	Elavl1	0.00227369	0.18	-0.47	-1.61
1425582_a_at	Emcn	0.00246789	-0.71	0.76	1.16
1428321_at	Eml1	0.00176405	0.41	0.06	-1.31
1451161_a_at	Emr1	0.000986937	0.09	0.96	1.4
1421624_a_at	Enah	0.00406002	-0.33	-0.49	-2.07
1424801_at	Enah	0.00119539	-0.14	-0.52	-1.36
1420965_a_at	Enc1	0.00191435	-0.28	0.56	1
1459546_s_at	Enpp1	0.00293717	0.14	0.37	1.08
1427302_at	Enpp3	0.00328572	0.24	-0.000913042	-1.28
1440534_at	ENSMUSG00000056615	0.000654944	0.01	-0.67	-1.53
1422823_at	Eps8	0.00284691	-0.24	1.44	1.73
1422824_s_at	Eps8	0.00029598	-0.43	1.31	1.3
1453634_a_at	Erp29	0.0021058	-0.09	0.58	1
1418637_at	Etv3	0.00408595	-0.19	0.29	1.4
1450241_a_at	Evi2a	0.000418375	0.43	2.32	2.81
1434920_a_at	Evl	0.00017385	-0.07	2.12	3.35
1442542_at	Eya4	0.00538712	-0.18	0.54	1.13
1450850_at	Ezr	0.000771193	0.21	0.8	1.05
1417408_at	F3	0.00114497	0.48	-0.3	-1.2
1424155_at	Fabp4	0.000547879	0.18	-0.77	1.21
1416021_a_at	Fabp5	1.71204e-06	-0.38	2.64	3.39
1416022_at	Fabp5	2.29183e-05	-0.45	3.18	5.04
1417552_at	Fap	0.00737275	-0.31	0.53	1.22
1452826_s_at	Fbxl20	0.000140532	-0.19	0.09	1.15
1456378_s_at	Fbxl20	5.36159e-05	-0.11	0.39	1.42
1434122_at	Fbxo27	0.0061163	0.15	-1.09	-0.62
1429441_at	Fbxo30	0.000859221	0.12	-0.6	-1.02
1436550_at	Fbxo30	0.00331076	-0.05	-0.69	-1.07
1453137_at	Fbxo30	0.000619515	0.00587898	-0.4	-1.31
1418340_at	Fcer1g	2.93518e-05	-0.05	2.98	3.46
1417876_at	Fcgr1	0.00082043	-0.05	1.82	2.03
1435477_s_at	Fcgr2b	0.000698443	-0.04	1.9	2.11
1451941_a_at	Fcgr2b	0.000938556	-0.17	1.97	2.27
1448620_at	Fcgr3	0.000201405	-0.25	2.45	3.42
1425225_at	Fcgr4	0.000407572	-0.07	2.63	3.15
1448891_at	Fcrls	0.00105977	-0.09	1.59	2
1434181_at	Fermt2	0.00069869	-0.11	-0.35	-1.13
1454593_at	Fgd3	0.00130618	0.57	0.08	-1.1
1423136_at	Fgf1	0.0024831	0.17	-0.42	-1.32
1450869_at	Fgf1	0.00432844	0.1	-0.29	-1.07
1418497_at	Fgf13	0.00107516	0.2	-0.4	-1.73
1420847_a_at	Fgfr2	0.00144725	0.15	-0.39	-1.05
1433489_s_at	Fgfr2	0.00520382	0.03	-0.37	-1.11
1421841_at	Fgfr3	0.0053432	-1.13	0.28	-0.26
1421854_at	Fgl2	0.000213083	0.02	-0.07	-1.02
1416113_at	Fkbp8	0.00643865	-0.11	0.54	1.35
1423663_at	Flcn	0.00459008	-0.15	0.2	1.09
1456744_x_at	Flcn	0.000924328	0.79	-1.43	-1.1
1422024_at	Fli1	0.00046809	0.09	1.33	1.5
1438702_at	Flrt2	0.00773787	-0.39	0.79	1.25
1434424_at	Flvcr1	0.00281792	-0.16	0.49	1.5
1439397_at	Fmn1	0.000219105	-0.43	0.84	1.61
1439189_at	Fnip2	0.000526923	-0.41	0.86	1.7
1451648_a_at	Folr2	0.00372427	-0.03	1.04	1.48
1434939_at	Foxf1a	0.00623909	0.09	-0.63	-1.41
1423465_at	Frrs1	0.000227655	0.04	1.31	1.73
1416658_at	Frzb	3.97775e-05	0.09	2.06	2.5
1448424_at	Frzb	0.000129859	-0.24	2.58	2.3
1416514_a_at	Fscn1	0.000347513	0.11	1.41	2.34
1418364_a_at	Ftl1	0.000493355	0.07	1.41	1.72
1422301_at	Ftl2	3.58435e-05	-0.25	1.4	2.15
1416046_a_at	Fuca2	0.00244941	0.1	1.22	1.88
1418296_at	Fxyd5	0.00446833	-0.25	0.75	1.22
1418534_at	Fzd2	0.00147161	0.34	-0.4	-1.07
1450971_at	Gadd45b	0.00625545	-0.46	0.43	1.74
1453851_a_at	Gadd45g	0.00153718	-0.49	-0.16	1.04
1452907_at	Galc	0.00098912	0.04	1.03	2.29
1455798_at	Galk2	0.000744755	-0.04	0.71	1.78
1452583_s_at	Galm	0.000298875	-0.32	-0.03	1.42
1448744_at	Galns	0.000250865	-0.32	1.6	1.69
1452232_at	Galnt7	0.000961851	0.00856632	0.89	1.55
1429692_s_at	Gch1	0.00620751	-0.14	1.11	1.11
1435749_at	Gda	0.00724478	-0.2	1.01	1.68
1424076_at	Gdpd1	0.00326692	-0.62	1.34	1.9
1450835_a_at	Gfra4	0.00725732	-0.13	-0.07	-1.12
1418248_at	Gla	0.00643649	0.49	1.55	2.54
1433728_at	Glb1l2	0.00341693	0.28	-0.18	-1.17
1424927_at	Glipr1	0.000282039	-0.22	0.65	1.41
1416592_at	Glrx	0.000189307	-0.31	0.05	2.2
1419027_s_at	Gltp	0.000358172	-0.34	0.84	1.16
1445503_at	Gm715	2.96047e-06	-0.25	0.2	-1.01
1439428_x_at	Gmds	0.00635702	0.04	0.13	1.27
1431686_a_at	Gmfb	0.00171897	-0.11	0.5	1.5
1448571_a_at	Gmfb	0.00087611	-0.12	0.82	1.33
1419193_a_at	Gmfg	0.00143884	-0.38	0.79	2.89
1417506_at	Gmnn	0.00152124	-0.27	0.41	1.85
1422555_s_at	Gna13	0.00714677	-0.19	0.81	1.34
1433749_at	Gna13	0.000774037	-0.18	0.28	1.03
1450656_at	Gna13	0.00414109	-0.17	0.77	1.71
1448810_at	Gne	0.00732415	-0.15	-0.33	-1.08
1455583_at	Gne	0.00392727	0.4	-0.44	-1.68
1456620_at	Gnptab	0.00701062	0.03	0.49	1.02
1425942_a_at	Gpm6b	0.00167573	-0.04	1.03	1.64
1448303_at	Gpnmb	2.45134e-05	0.12	4.14	4.95
1440225_at	Gpr116	0.00302773	-0.06	-0.06	1.88
1449670_x_at	Gpr137b	0.000166625	0.15	2.13	2.93
1429775_a_at	Gpr137b-ps	4.88898e-05	0.12	2.44	3.45
1439256_x_at	Gpr137b-ps	0.000203686	-0.26	2.29	2.99
1450881_s_at	Gpr137b-ps	9.93909e-05	-0.00503417	2.02	2.66
1450882_s_at	Gpr137b-ps	6.39064e-05	-0.23	2.39	3.24
1434073_at	Gprasp2	0.00145555	-0.02	-0.31	-1.65
1424895_at	Gpsm2	0.0030873	0.38	-0.45	-2.29
1417673_at	Grb14	0.00712503	0.29	-0.17	-1.29
1434728_at	Gria3	0.00141059	-0.48	-0.05	-2.52
1435722_at	Gria4	0.00149663	0.06	-0.01	-1.27
1460028_at	Grip2	0.000256376	0.45	-0.68	-1.78
1448148_at	Grn	0.00119495	-0.00676213	0.65	1.06
1455476_a_at	Gse1	0.00667633	0.28	1.5	1.26
1425626_at	Gstm1	0.00636628	0.39	-0.36	-1.6
1420533_at	Gucy1a3	0.000942572	0.29	-0.25	-1.57
1420534_at	Gucy1a3	0.00127202	0.15	-0.54	-1.47
1434141_at	Gucy1a3	0.00344385	0.22	-0.15	-1.22
1420871_at	Gucy1b3	0.00129606	0.0032884	-0.44	-1.43
1420872_at	Gucy1b3	0.00217665	0.01	-0.3	-1.22
1430332_a_at	Gusb	0.000623602	-0.14	2.11	1.91
1448124_at	Gusb	0.000119309	-0.13	1.65	2.25
1438858_x_at	H2-Aa	0.00118917	0.14	2.52	2.64
1443783_x_at	H2-Aa	0.007626	0.25	2.26	2.04
1451721_a_at	H2-Ab1	0.000274052	-0.25	1.94	2.77
1417025_at	H2-Eb1	0.00106775	0.19	1.62	2.17
1449556_at	H2-T23	0.00371643	-0.04	0.8	1.22
1435977_at	Hdgfrp3	0.00201391	-0.14	-0.16	-1.03
1449024_a_at	Hexa	0.00044759	-0.13	0.58	1.12
1437874_s_at	Hexb	0.000160641	-0.04	0.67	1
1460180_at	Hexb	0.000641075	-0.05	0.96	1.41
1419302_at	Heyl	0.00383145	0.6	-0.25	-1.42
1438886_at	Heyl	0.000219904	0.74	-0.28	-1.28
1458802_at	Hivep3	0.000405134	0.13	0.49	1.31
1434735_at	Hlf	0.00724383	0.23	-0.57	-1.36
1416184_s_at	Hmga1	0.000860169	0.34	0.71	1.7
1438988_x_at	Hn1	0.00131324	-0.06	0.81	1.37
1455740_at	Hnrnpa1	0.0019841	0.25	-0.47	-1.4
1428662_a_at	Hopx	0.0013427	-0.17	1	2.15
1444204_at	Hoxb2	6.88782e-05	-0.02	1.72	-0.55
1448881_at	Hp	0.000432975	-0.66	0.29	3.05
1419109_at	Hrc	5.39344e-05	0.28	-0.33	-1.51
1450047_at	Hs6st2	8.69141e-08	-0.00444347	2.05	3.36
1436332_at	Hspb6	0.00622574	0.19	-0.3	-1.06
1418260_at	Hunk	0.00216592	0.47	0.3	-1.51
1449954_at	Hyal1	0.00628296	0.32	-0.15	-1.08
1429990_at	Hyal4	0.00537353	0.59	1.07	-1.55
1429119_at	Iah1	0.000283748	0.57	0.00842117	1.35
1424067_at	Icam1	3.01126e-05	0.02	1.15	1.08
1450928_at	Id4	0.00219852	0.00977339	-0.1	-1.37
1453988_a_at	Ide	0.000181587	-0.05	-0.27	1.59
1448775_at	Ifi203	0.00281669	0.01	0.83	2.11
1419603_at	Ifi204	0.00304008	0.02	1.62	1.98
1452348_s_at	Ifi205	0.000867508	0.33	1.7	1.92
1452349_x_at	Ifi205	0.000349998	0.1	1.4	2.29
1422476_at	Ifi30	0.00423199	-0.24	1.23	1.58
1440865_at	Ifitm6	0.000209194	1.1	0.97	0.05
1422403_at	Ifna7	0.00235915	-0.06	-0.28	-1.66
1440169_x_at	Ifnar2	0.002174	0.32	1.83	1.58
1419519_at	Igf1	0.00346493	-0.23	0.77	1.39
1437401_at	Igf1	0.00472084	-0.13	0.52	1.05
1452014_a_at	Igf1	0.00148282	-0.05	1.22	1.98
1427329_a_at	Igh-6	0.000139365	0.42	0.45	3.24
1420518_a_at	Igsf9	0.000121411	0.71	-0.32	-1.28
1419455_at	Il10rb	0.000649244	-0.04	1.01	2.01
1427164_at	Il13ra1	0.000445115	-0.41	1.76	2.77
1427165_at	Il13ra1	0.00181067	-0.05	1.5	1.03
1454783_at	Il13ra1	0.00223847	-0.22	0.83	1.13
1416295_a_at	Il2rg	0.00135004	0.05	1.45	2.36
1448575_at	Il7r	0.000492674	0.63	3.77	4.61
1426858_at	Inhbb	0.00740028	0.45	0.27	1.36
1416714_at	Irf8	0.00169854	0.28	1.9	2.61
1422445_at	Itga6	0.00696028	-0.54	1.19	2.5
1417279_at	Itpr1	0.00120791	-0.00523726	-0.26	-1.07
1425718_a_at	Ivns1abp	6.33313e-05	-0.22	0.01	1.13
1450084_s_at	Ivns1abp	0.000151353	-0.32	0.13	1.13
1426497_at	Jarid1c	0.00224929	-0.1	1.04	1.43
1452635_x_at	Josd3	0.00180203	-0.51	0.19	1.49
1455404_at	Jph2	0.00308164	0.22	-0.61	-1.38
1451262_a_at	Jtv1	0.00122119	-0.14	-0.11	-1.15
1433742_at	Kank1	0.000886497	0.11	-0.27	-1.15
1448468_a_at	Kcnab1	0.0012212	-0.08	-0.43	-1.47
1454043_a_at	Kcnab1	0.0039809	-0.16	-0.56	-1.86
1435720_at	Kcnd3	0.00139445	-0.04	-0.48	-1.63
1449544_a_at	Kcnh2	0.00671272	0.44	-0.03	-1.14
1437631_at	Kcnip4	0.00603331	-0.46	-0.2	-1.46
1421400_at	Kcnmb1	0.00678249	0.17	-0.35	-1.46
1435721_at	Kcnq4	0.00208596	0.13	-0.76	-1.07
1455746_at	Kif13a	0.00058792	-0.08	-0.35	-1.02
1437716_x_at	Kif22	0.00705031	-0.76	1.23	1.52
1448117_at	Kitl	0.000821175	-0.43	0.06	-1.09
1417395_at	Klf4	0.00756682	-0.49	0.62	1
1435743_at	Klhl23	0.000805837	-0.08	-0.3	-1.82
1425436_x_at	Klra9	0.00249094	0.31	0.71	1.38
1449014_at	Lactb	0.00392973	0.13	0.42	4.8
1430447_a_at	Lair1	0.000946944	0.08	2.24	2.47
1424807_at	Lama4	0.00628543	-0.48	-0.42	-1.03
1424114_s_at	Lamb1-1	0.000130308	-0.31	0.78	1.24
1425594_at	Lamc3	0.00516463	0.06	-0.31	-1.58
1416343_a_at	Lamp2	0.00014732	-0.07	0.69	1.16
1416344_at	Lamp2	0.000880147	-0.02	0.69	1.27
1426025_s_at	Laptm5	6.64897e-05	0.66	2.36	2.63
1436905_x_at	Laptm5	3.98613e-05	0.22	2.52	2.52
1434418_at	Lass6	0.00644896	0.01	0.72	1.45
1450609_at	Lcn8	0.00602964	0.22	-0.89	-1.03
1415983_at	Lcp1	0.00033992	0.4	3.25	3.48
1456156_at	Lepr	0.00164629	0.46	-0.8	-1.68
1426808_at	Lgals3	1.03085e-05	0.11	3.55	3.78
1448883_at	Lgmn	0.000527178	-0.00564425	1.61	2
1427028_at	Lgr6	0.00828753	0.09	-0.53	-1.04
1434129_s_at	Lhfpl2	0.000751767	0.26	2.84	3.81
1454847_at	Lhfpl2	0.00123841	0.00258209	3.13	2.75
1416641_at	Lig1	0.00209441	-0.39	0.59	1.21
1420394_s_at	Lilrb4	1.77495e-05	-0.26	3.48	4.04
1435106_at	Limch1	0.0075155	0.2	-0.48	-1.49
1423140_at	Lipa	0.002163	0.01	2.12	2.5
1423141_at	Lipa	0.00345367	0.09	1.84	2.58
1450872_s_at	Lipa	0.00270112	0.17	1.88	2.28
1416303_at	Litaf	0.00407228	0.02	0.98	1.17
1416304_at	Litaf	0.000319207	-0.11	2.27	1.91
1439255_s_at	LOC100044979	0.000117991	-0.000104294	2.15	3.01
1445422_at	LOC621549	0.00310154	0.19	-0.18	-1.19
1451965_at	LOC672450	4.73173e-05	0.86	-0.19	3.96
1431213_a_at	LOC67527	0.00109404	0.13	0.19	1.64
1429863_at	Lonrf3	0.00220751	-0.69	1.13	1.59
1424459_at	Lpcat1	0.000348969	-0.34	0.85	1.19
1451359_at	Lpcat1	0.00486651	-1.17	0.54	0.88
1431056_a_at	Lpl	0.000139689	0.27	0.89	2.48
1433864_at	Lrp12	0.00142835	-0.31	1.54	2.26
1429679_at	Lrrc17	0.000998789	-0.06	0.00814192	-1.37
1433505_a_at	Lrrc8d	0.000423828	0.09	0.86	2.09
1417756_a_at	Lsp1	0.00502341	-0.01	0.6	1.44
1418061_at	Ltbp2	2.23797e-06	-0.15	1.36	2.25
1423607_at	Lum	2.91922e-05	-0.37	1.08	0.86
1421571_a_at	Ly6c1	0.00237533	-0.06	0.54	1.09
1451318_a_at	Lyn	0.00113807	-0.01	1.07	2.26
1423704_at	Lypla3	0.000836436	0.19	0.96	1.23
1436996_x_at	Lyz1	9.60267e-06	-0.12	1.41	1.09
1423547_at	Lyz2	7.88926e-05	0.07	1.42	1.36
1422460_at	Mad2l1	0.000452704	0.26	2.36	2.26
1444073_at	Maf	0.00109959	-1.13	0.1	0.34
1453152_at	Mamdc2	0.00208766	-0.17	1.61	1.8
1417110_at	Man1a	0.00234092	-0.00777415	0.63	1.37
1436193_at	Man1c1	0.00240201	-0.24	1.67	1.62
1456028_x_at	Marcks	0.00697708	0.07	0.79	1.12
1415922_s_at	Marcksl1	0.00207922	-0.4	0.9	1.47
1423501_at	Max	0.00318117	-0.79	-0.63	1.05
1416357_a_at	Mcam	0.00197269	0.02	-0.48	-1.34
1420028_s_at	Mcm3	0.000996758	-0.39	0.65	1.25
1459882_at	Mcm9	0.00152205	0.71	0.64	-1.05
1427040_at	Mdfic	0.000542203	-0.28	0.95	1.84
1460283_at	Mefv	0.000387807	-0.01	0.89	1
1429256_at	Meg3	0.00711964	0.3	0.29	-1.53
1439380_x_at	Meg3	0.00619769	0.03	-0.33	-1.04
1449821_a_at	Memo1	0.00738791	-0.49	0.36	1.16
1416397_at	Mesdc1	0.00538718	-1	0.4	0.54
1424356_a_at	Metrnl	0.00012464	-0.15	0.94	1.74
1424129_at	Mfsd1	0.000910177	0.13	0.63	1.13
1437055_x_at	Mfsd1	0.00784411	-0.05	0.76	1.51
1438239_at	Mid1	0.0029047	-1.3	-0.62	-0.44
1448383_at	Mmp14	0.000407387	-0.14	1.54	1.65
1448598_at	Mmp17	0.0036399	0.26	-0.35	-1.12
1416136_at	Mmp2	0.000381853	0.00762416	0.51	1.15
1439364_a_at	Mmp2	0.000391251	-0.01	0.33	1.04
1454867_at	Mn1	0.000368498	0.21	-0.74	-1.35
1429284_at	Mobkl2b	0.000465479	1.4	-0.44	-0.58
1423218_a_at	Mrpl49	0.000994835	-0.89	1.05	0.27
1422245_a_at	Mrvi1	0.00260961	0.38	-0.37	-1.47
1459665_s_at	Mrvi1	0.000124742	0.52	-0.3	-1.18
1418826_at	Ms4a6b	0.00272592	-0.38	0.75	1.56
1450234_at	Ms4a6c	9.96057e-05	-0.5	2.22	2.2
1419598_at	Ms4a6d	0.000145831	-1.09	3.77	4.39
1419599_s_at	Ms4a6d	4.18505e-05	-0.19	3.56	4.28
1454997_at	Msrb3	0.0038397	0.13	-0.04	-1.04
1428942_at	Mt2	0.000845977	-0.24	1.09	1.39
1421851_at	Mtap1b	0.00583994	-0.02	-0.35	-1.46
1418333_at	Mtf1	0.00022	-0.62	-0.51	2.14
1419253_at	Mthfd2	0.00598461	-0.95	0.26	1.21
1440847_at	Mtss1	0.00509844	-0.05	0.33	1.43
1425504_at	Mylk	0.00783762	0.15	-0.25	-1.99
1450650_at	Myo10	0.00076593	0.37	0.61	1.22
1428509_at	Myo1e	0.000284547	-0.16	0.45	1.17
1419754_at	Myo5a	0.000202173	0.15	1.53	2.46
1436051_at	Myo5a	0.00099405	-0.01	0.81	1.75
1417707_at	N4bp2l1	0.00169504	-0.51	0.7	1.34
1420152_at	NA1	0.00746663	-0.19	0.07	1.4
1420167_at	NA2	0.00238897	1.74	0.00495611	-0.48
1434632_at	NA3	0.00177387	-0.05	-0.02	-1.06
1435144_at	NA4	0.0072334	0.63	1.85	1.86
1435872_at	NA5	0.00170394	0.43	0.32	1.71
1436218_at	NA6	0.00403484	0.13	-0.36	-1.85
1437811_x_at	NA7	0.000266717	0.25	3.91	3.23
1439799_at	NA8	0.000516533	-0.42	0.07	-1.94
1439906_at	NA9	0.00608197	0.1	-0.24	-1
1439956_at	NA10	0.00281414	0.00153659	1.01	1.59
1440284_at	NA11	8.08884e-05	0.13	1.37	3.54
1440388_at	NA12	0.00260909	1.41	0.27	0.05
1440431_at	NA13	0.00118713	0.04	0.00577515	-1.2
1441220_at	NA14	0.000529751	-0.15	1.37	0.08
1441679_at	NA15	0.00527878	0.61	-0.22	-1.18
1441769_at	NA16	0.00131006	-0.07	0.28	1.09
1441971_at	NA17	0.00100234	0.37	0.02	1.2
1442257_at	NA18	0.000240236	-0.24	-0.46	-2.37
1442393_at	NA19	0.000168414	0.23	1.07	1.85
1442620_at	NA20	0.00493455	-0.01	1.29	-0.1
1443179_at	NA21	1.66649e-05	-2.48	0.65	3.1
1443341_at	NA22	0.00304144	-0.23	0.66	1.2
1443363_at	NA23	3.08026e-05	0.38	-0.43	-1.24
1444973_at	NA24	0.00141143	0.06	-0.16	-1.11
1445518_at	NA25	0.000868231	-0.11	0.67	2.36
1445774_at	NA26	0.00245799	0.27	-0.18	-1.31
1446156_at	NA27	0.00469707	0.26	-0.4	-1.43
1446364_at	NA28	0.00359023	0.49	-1.31	-2.98
1446386_at	NA29	4.29452e-07	-0.58	0.36	2.4
1446608_at	NA30	0.00544744	0.02	-0.0016053	1.41
1446772_at	NA31	0.00692963	0.88	-0.43	-1.29
1446998_at	NA32	0.00714482	0.05	-0.02	-1.08
1454965_at	NA33	0.00548918	-0.08	-0.54	-1.43
1455298_at	NA34	0.000388426	-0.06	-0.32	-1.64
1455473_at	NA35	0.000280074	-0.08	-0.75	-2.4
1456715_at	NA36	7.50121e-05	0.07	0.21	1.25
1457138_x_at	NA37	0.000572809	-0.02	-1.58	0.17
1457743_at	NA38	0.00217527	0.21	-0.55	-1.47
1458099_at	NA39	0.0022924	1.09	-0.53	2.07
1458712_at	NA40	0.00179896	0.44	-1.35	-0.79
1458746_at	NA41	0.00391364	0.2	-0.32	-1.02
1459686_at	NA42	0.00152626	0.41	-0.54	-1.17
1460061_at	NA43	6.20489e-05	0.35	-0.09	-1.42
AFFX-BioB-3_at	NA44	0.000935122	0.35	2.85	1.17
1417706_at	Naglu	0.00114734	-0.22	0.84	1.53
1448083_at	Nalcn	0.000851022	0.16	0.05	-1.05
1417411_at	Nap1l5	0.000738605	0.41	-0.25	-1.25
1417926_at	Ncapg2	0.00294711	-0.64	0.63	1.42
1456772_at	Ncf1	0.00042472	-0.07	1.58	2.8
1448561_at	Ncf2	0.000183666	-0.4	2.57	2.84
1415923_at	Ndn	4.98019e-05	0.03	-0.01	-1.14
1449251_at	Ndp	0.00726329	0.12	-0.23	-1.46
1418962_at	Necap2	0.000351259	-0.05	0.59	1.6
1434931_at	Neo1	0.000116891	0.04	-0.35	-1.45
1416831_at	Neu1	0.00070843	-0.05	0.66	1
1435649_at	Nexn	0.00204517	-0.03	-0.46	-1.04
1417621_at	Nfatc1	0.00525391	-0.13	0.35	1.72
1447085_s_at	Nfatc1	0.00588032	-0.33	0.17	1.29
1438728_at	Nif3l1	4.03455e-06	-0.32	0.28	1.09
1417278_a_at	Nkd1	0.00250106	0.75	-0.43	-1.72
1429506_at	Nkd1	0.0023305	0.79	-0.45	-1.2
1437176_at	Nlrc5	0.00607857	-0.17	0.52	1.96
1435277_x_at	Nme1	0.00233178	-0.64	1.23	1.52
1424019_at	Nol1	0.00490909	0.15	0.3	1.37
1419161_a_at	Nox4	0.00174049	0.17	-0.22	-1.13
1416901_at	Npc2	0.00031574	-0.14	0.54	1.1
1455768_at	Npc2	0.000233483	-0.02	0.85	1.93
1426560_a_at	Npnt	0.00314528	0.15	-0.21	-1
1452106_at	Npnt	0.00315871	-0.04	-0.15	-1.16
1435991_at	Nr3c2	0.000555102	0.07	-0.2	-1.35
1423055_at	Nsg1	0.00019766	-0.17	1.56	0.79
1434802_s_at	Ntf3	0.0081112	0.05	-0.46	-1.52
1433825_at	Ntrk3	0.000661304	0.1	-0.31	-1.03
1441689_at	Nup153	0.000468104	1.71	-0.32	0.41
1447905_x_at	Nup62	0.00528909	-0.17	0.52	2.71
1437069_at	Osbpl8	0.000299895	0.12	0.89	1.73
1418674_at	Osmr	0.000102229	0.02	0.9	1.05
1449350_at	Osr1	0.0046783	0.09	0.08	-1.41
1452246_at	Ostf1	0.0075528	-0.13	0.42	1.09
1442917_at	OTTMUSG00000002879	6.74036e-05	0.25	-0.93	-1.58
1460719_a_at	P2rx1	6.65076e-05	-0.17	0.08	-1.74
1425525_a_at	P2rx4	0.000377513	0.16	1.12	1.94
1452527_a_at	P2rx4	0.000295224	-0.03	1.11	1.73
1419853_a_at	P2rx7	0.0014625	0.02	0.61	1.84
1439787_at	P2rx7	0.0018099	0.00989071	0.73	1.14
1428859_at	Paox	0.00457852	-0.25	0.27	1.15
1448627_s_at	Pbk	5.4309e-05	-0.68	1.22	1.04
1451132_at	Pbxip1	0.00231684	0.15	-0.21	-1.01
1437442_at	Pcdh7	0.000604004	0.26	-0.38	-1.09
1456214_at	Pcdh7	0.000243882	0.16	-0.48	-1.18
1420429_at	Pcdhb3	0.00106451	0.05	0.52	1.57
1449527_at	Pcdhb7	0.00332969	0.39	1.35	1.1
1422640_at	Pcdhb9	0.000704161	-0.13	1.17	1.66
1416073_a_at	Pcnt	0.00449647	-0.21	-0.77	1.43
1452913_at	Pcp4l1	0.00105854	-0.02	-0.52	-1.82
1437339_s_at	Pcsk5	0.000510347	-0.06	-0.26	-1.56
1451406_a_at	Pcsk5	5.40038e-05	-0.07	-0.25	-1.5
1426981_at	Pcsk6	0.000496479	0.07	-0.2	-1.08
1450638_at	Pdcd5	0.000732456	-0.73	-0.68	-1.3
1449298_a_at	Pde1a	0.000133035	-0.28	0.93	1.14
1417626_at	Pde4dip	0.0025962	-0.08	-0.78	-1.25
1449351_s_at	Pdgfc	0.00290073	-0.14	0.48	1.06
1456532_at	Pdgfd	0.000800713	-0.11	-0.17	-1.18
1443299_at	Pdlim3	0.000881992	0.13	-0.37	-1.48
1449178_at	Pdlim3	0.00654789	-0.08	-0.47	-1.36
1428319_at	Pdlim7	0.00336157	0.11	-0.42	-1.04
1451269_at	Pdzd11	0.0036629	0.36	2.18	0.54
1435553_at	Pdzd2	8.2976e-05	0.36	-0.35	-1.07
1437181_at	Peli2	0.000550536	0.21	-0.28	-1.11
1423706_a_at	Pgd	0.000315215	8.4433e-05	-0.00308457	1.38
1436771_x_at	Pgd	0.00199057	0.07	0.04	1.11
1437380_x_at	Pgd	0.000111834	-0.11	0.05	1.2
1437871_at	Pgm5	0.00607119	-0.26	-0.2	-1.32
1454832_at	Phactr1	0.00378632	0.17	0.16	-1.41
1429520_a_at	Phca	0.000582014	-0.19	0.89	1.1
1454714_x_at	Phgdh	0.0023648	-0.16	-0.05	1.57
1456471_x_at	Phgdh	0.000473268	-1.34	-0.11	1.49
1435601_at	Phlppl	0.00189142	-0.46	1.61	0.05
1437067_at	Phtf2	0.00255163	-0.11	-0.38	-1
1436761_s_at	Phyhipl	0.00091577	0.05	-0.35	-1.22
1454605_a_at	Pi4k2a	0.00413585	0.1	0.5	1.07
1420411_a_at	Pi4k2b	0.000167946	-0.5	0.19	2.15
1422707_at	Pik3cg	0.00123966	0.38	1.29	1.27
1435458_at	Pim1	0.00374751	0.66	0.02	1.97
1420464_s_at	Pira6	7.07833e-05	0.28	3.54	4.57
1435066_at	Pitpnc1	0.00481231	0.64	0.56	1.79
1452939_a_at	Pitpnc1	0.00236133	-0.04	0.97	1.96
1422147_a_at	Pla2g6	0.001787	1.51	-0.17	0.77
1451335_at	Plac8	0.00290773	0.44	1.12	1.71
1426926_at	Plcg2	0.00766727	0.11	1.15	0.94
1436821_at	Plcxd3	0.000721994	0.09	0.28	-1.07
1448749_at	Plek	0.00617128	0.5	2.07	2.82
1434680_at	Plekhg3	0.00731929	0.08	-0.29	-1.33
1423359_at	Pln	0.00262866	0.08	0.07	-1.01
1429527_a_at	Plscr1	0.00100699	0.05	1.27	1.62
1417963_at	Pltp	0.00180758	-0.05	1.16	1.7
1441098_at	Pnldc1	0.000113914	0.31	-0.8	-1.49
1451361_a_at	Pnpla7	0.00163654	-0.07	1.18	1.28
1416957_at	Pou2af1	0.000611239	0.16	0.02	3.74
1417801_a_at	Ppfibp2	0.00317518	-0.05	1.14	-0.12
1416498_at	Ppic	0.00010257	-0.29	0.59	1.12
1445850_at	Ppp1r12b	0.00609582	0.52	-0.2	-1.32
1430125_s_at	Pqlc1	0.000529448	-0.21	0.42	1.27
1429308_at	Prdm16	0.00295742	0.31	-0.07	-1.09
1436962_at	Prdm6	0.00703676	0.14	-0.33	-1.09
1449824_at	Prg4	0.000722526	0.16	3.33	3.99
1450519_a_at	Prkaca	0.00569244	-0.02	-0.06	-1.05
1460419_a_at	Prkcb	0.000859151	-0.01	1.93	1.8
1434248_at	Prkch	5.33156e-05	-0.06	0.93	1.98
1434334_at	Prkd2	0.00727103	-1.11	0.95	0.83
1424287_at	Prkx	0.00702437	-1.05	0.84	1.02
1420664_s_at	Procr	0.0053782	-0.25	0.77	1.02
1439549_at	Prrg3	0.00266274	0.08	-0.19	-1.07
1454607_s_at	Psat1	0.000613061	-0.75	0.25	1.11
1425869_a_at	Psen2	0.00317136	-0.4	0.23	1.02
1457256_x_at	Ptch2	0.000861818	0.5	-0.47	-1.34
1456681_at	Ptchd1	0.00627568	1.94	0.13	1.85
1450344_a_at	Ptger3	0.00151432	1	-0.64	-0.26
1417262_at	Ptgs2	0.00268586	-0.27	1.76	1.7
1417263_at	Ptgs2	0.0058389	-0.59	2.31	1.55
1417068_a_at	Ptpn1	0.0012677	0.16	0.85	1.52
1422124_a_at	Ptprc	0.00129323	0.4	1.86	2.45
1417676_a_at	Ptpro	0.000111134	-0.19	1.2	1.98
1427019_at	Ptprz1	0.000179442	0.3	-0.27	-1.45
1452284_at	Ptprz1	0.0047555	0.12	-0.67	-1.49
1417346_at	Pycard	0.0010941	-0.29	1.9	1.91
1433504_at	Pygb	0.000868367	0.18	0.03	-1.17
1417073_a_at	Qk	0.00303354	0.14	0.44	1.18
1416165_at	Rab31	0.000315821	-0.09	0.94	1.19
1416527_at	Rab32	0.00042008	0.06	0.56	1.13
1437446_at	Rab5b	0.00472418	0.95	3.11	1.13
1424684_at	Rab5c	6.97948e-05	-0.23	0.82	2.31
1426799_at	Rab8b	0.00232566	-0.03	0.68	1.27
1457969_at	Rabif	0.000244598	-0.28	1.8	0.12
1417620_at	Rac2	0.00118566	0.31	1.84	2.84
1417400_at	Rai14	0.000196868	-0.35	1.27	1.7
1417481_at	Ramp1	0.00427997	-0.01	-0.27	-1.29
1434302_at	Raph1	0.000134263	-0.09	0.53	1.54
1434303_at	Raph1	4.07129e-05	-0.53	0.68	1.39
1428067_at	Rasl12	0.00162437	0.27	-0.4	-1.27
1448547_at	Rassf3	0.00556206	0.19	-0.49	-1.16
1439622_at	Rassf4	0.000568092	-0.17	1.21	2.99
1422638_s_at	Rassf5	0.00596417	-0.2	0.49	1
1425652_s_at	Rbpms	0.000488652	0.34	-0.24	-1.36
1429359_s_at	Rbpms	0.00412089	0.12	-0.24	-1.29
1437161_x_at	Rbpms	0.00218138	0.15	-0.42	-1.05
1455936_a_at	Rbpms	0.000606282	0.37	-0.66	-1.07
1452359_at	Rell1	0.00341955	0.04	0.57	1.12
1428895_at	Rftn2	0.000847456	0.38	-0.22	-1.16
1416882_at	Rgs10	0.00501785	-0.26	0.86	1.21
1434940_x_at	Rgs19	0.00367706	0.05	0.93	1.61
1416286_at	Rgs4	0.000572708	-0.29	-0.48	-1.31
1416287_at	Rgs4	0.00182429	-0.22	-0.37	-1.1
1420940_x_at	Rgs5	0.000993163	-0.16	-0.00150132	-1.3
1420941_at	Rgs5	6.75827e-06	-0.05	0.14	-1.67
1420942_s_at	Rgs5	0.000153898	0.00965961	0.09	-1.02
1450659_at	Rgs7	0.00386117	-0.00282346	-0.88	-1.34
1436876_at	Rgs7bp	0.00560617	-0.1	-0.05	-1.22
1437559_at	Rgs7bp	0.000427081	0.19	-0.11	-1.25
1458534_at	Rgs7bp	0.00125937	-0.02	-0.28	-2.33
1447818_x_at	Rhebl1	0.00376444	-1.29	0.27	-1.11
1429206_at	Rhobtb1	0.00190062	0.13	-0.37	-1.35
1422572_at	Rhog	0.000144143	-0.07	0.62	3.76
1450648_s_at	Rmcs5	0.000112194	0.22	2.29	3.71
1430805_s_at	Rmi1	4.75204e-06	0.1	0.24	1.25
1426604_at	Rnasel	0.00197912	0.56	1.52	1.81
1458962_at	Rnf103	0.00532912	-0.54	1.4	-1.22
1429321_at	Rnf149	0.000282378	-0.12	1.25	2.71
1432478_a_at	Rnf19b	0.000139257	-0.29	0.73	2.58
1424083_at	Rod1	0.00052474	-0.26	1.15	2.48
1451370_at	RP23-195K8.6	0.00203981	0.17	-0.5	-1.09
1419585_at	Rp2h	0.00234237	0.06	0.92	1.17
1431050_at	Rps6ka5	0.00135585	0.07	0.29	-1.25
1422562_at	Rrad	0.00671519	0.48	-0.28	-1.61
1426123_a_at	Rrbp1	0.00274524	0.00575636	0.48	1.14
1434437_x_at	Rrm2	0.000451924	-0.66	1.62	1.55
1449319_at	Rspo1	0.00731821	0.39	0.34	-1.02
1418580_at	Rtp4	0.00123645	-0.83	1.83	1.94
1450123_at	Ryr2	0.000495851	0.5	-1.02	-1.54
1428176_at	S1pr2	0.000411197	-0.06	1.06	1.38
1423010_at	Sacs	0.00288152	-0.19	-0.61	-1.14
1418131_at	Samhd1	0.00296155	0.1	0.6	1.04
1417719_at	Sap30	0.00484586	-0.4	1.1	1.68
1434707_at	Sbf1	0.0059097	0.12	-0.22	1.21
1458308_at	Sbno2	0.00374008	0.32	1.04	2
1435767_at	Scn3b	0.00677518	-0.00809828	0.52	-1.12
1415943_at	Sdc1	0.000139659	-0.11	1.43	1.75
1437279_x_at	Sdc1	8.00826e-05	0.14	1.15	1.74
1450027_at	Sdc3	4.86575e-07	-0.25	1.94	2.35
1450941_at	Sdcbp	0.00139686	-0.28	1.06	0.82
1460698_a_at	Sec11c	0.00151083	-0.1	0.53	1.04
1420696_at	Sema3c	0.000528197	-0.22	-0.19	-1.36
1429348_at	Sema3c	0.000609832	-0.29	-0.37	-1.26
1429459_at	Sema3d	0.000742417	0.22	-0.28	-1.39
1420824_at	Sema4d	0.00113881	0.34	1.3	1.57
1436819_at	Sept6	0.000516123	0.4	-0.25	-1.21
1415828_a_at	Serp1	0.000406901	-0.15	0.23	1.01
1416702_at	Serpini1	0.00624811	-0.18	-0.39	-1.22
1448443_at	Serpini1	0.00656081	-0.54	-0.33	-1.33
1435353_a_at	Sfi1	0.0030688	0.22	1.05	1.07
1418747_at	Sfpi1	0.00825986	0.28	1.41	1.89
1451031_at	Sfrp4	0.000234443	-0.07	0.47	1.09
1421254_a_at	Sgcg	0.00272497	-0.00997701	-0.48	-1.64
1425181_at	Sgip1	0.00226299	-0.37	-0.3	-1.37
1416041_at	Sgk1	0.00184873	-0.57	0.54	1.02
1415892_at	Sgpl1	0.000510724	0.01	0.88	1.68
1431592_a_at	Sh3kbp1	0.000774745	-0.34	0.24	3.09
1435644_at	Sh3pxd2b	0.00169013	-1.33	2.54	2.57
1416985_at	Sirpa	9.40592e-05	-0.13	1.84	2.4
1448534_at	Sirpa	0.00134951	-0.02	1.8	2.29
1451227_a_at	Slc10a3	0.000263055	-0.6	0.56	1.1
1420361_at	Slc11a1	0.000308009	-0.16	1.29	1.9
1438377_x_at	Slc13a3	0.00510753	-2.44	1.73	1.36
1417600_at	Slc15a2	0.0046363	0.61	1.63	-0.08
1448385_at	Slc15a4	0.00582295	-0.27	0.56	1.73
1424308_at	Slc24a3	0.00160233	0.28	-0.54	-1.33
1420836_at	Slc25a30	0.00123275	-0.21	0.4	1.35
1455506_at	Slc25a34	0.000309315	0.44	-0.16	-1.44
1455731_at	Slc29a3	0.000417353	-0.19	0.6	1.21
1415958_at	Slc2a4	0.00484093	1.51	-0.88	-0.07
1453721_a_at	Slc31a2	0.00040743	-0.14	2.27	3.04
1436456_at	Slc38a9	0.000909807	-0.06	0.23	1.09
1424905_a_at	Slc39a11	8.39597e-05	-0.25	0.98	1.08
1425364_a_at	Slc3a2	0.000344995	-0.32	0.55	1.25
1452445_at	Slc41a2	0.00076709	-0.37	0.82	1.2
1455442_at	Slc6a19	0.000773099	0.3	-1.07	0.95
1437149_at	Slc6a6	0.000814517	-0.11	1.47	1.23
1417392_a_at	Slc7a7	4.7049e-05	-0.36	2.19	3.04
1420913_at	Slco2a1	0.000323922	-0.47	1.32	1.39
1420914_at	Slco2a1	0.000414749	-0.38	1.41	0.75
1444242_at	Slco2a1	2.33006e-05	-0.48	1.58	1.66
1451655_at	Slfn8	0.00135734	-1.11	1.85	1.55
1421215_a_at	Slmap	0.00157712	-0.14	-0.46	-1.47
1422771_at	Smad6	0.00220114	0.29	-0.21	-1.13
1448635_at	Smc2	0.00730334	-0.67	-0.09	1.14
1427276_at	Smc4	0.00653623	-0.35	0.88	1.59
1452469_a_at	Smtn	0.00440279	0.14	-0.25	-1.23
1429335_at	Snapc1	0.00474355	-0.09	0.17	1.24
1423499_at	Sncaip	0.00745168	-0.18	-0.55	-1.51
1431055_a_at	Snx10	0.00142522	-0.04	0.12	1.22
1417646_a_at	Snx5	0.000742107	-0.00276414	0.78	1.13
1417648_s_at	Snx5	0.00738837	0.14	0.81	1.14
1417696_at	Soat1	0.00102952	-0.11	1.5	2.26
1455899_x_at	Socs3	0.00243328	0.58	1.59	3.19
1456212_x_at	Socs3	0.000509557	0.85	2.6	3.68
1427785_x_at	Solh	4.83392e-05	-0.55	0.41	1.59
1433575_at	Sox4	0.000252122	-0.13	1.3	1.6
1416114_at	Sparcl1	0.000149633	-0.01	-0.18	-1.64
1451886_at	Speg	0.00529593	0.13	-0.02	-1.39
1451596_a_at	Sphk1	0.00163205	-0.25	1.11	1.36
1439034_at	Spn	0.00239903	0.19	0.53	1.6
1421278_s_at	Spna1	0.00340893	0.45	-0.91	-1.17
1444089_at	Spnb2	0.00656144	0.11	0.96	1.43
1423573_at	Srd5a3	0.000340647	-0.21	1.68	1.44
1423574_s_at	Srd5a3	0.00114862	-0.02	0.41	1.42
1417426_at	Srgn	0.00519746	-0.43	0.63	1.02
1427919_at	Srpx2	0.00765232	0.31	1.38	0.53
1418946_at	St3gal1	0.00668914	0.29	0.56	1.29
1428372_at	St5	0.00609389	0.2	-0.38	-1.41
1419186_a_at	St8sia4	0.00294029	0.67	1.09	2.27
1438566_at	St8sia6	0.000917836	0.32	0.27	2.22
1436324_at	Stard9	0.00129194	-0.2	0.6	1.08
1450033_a_at	Stat1	0.000147852	-0.02	0.27	2.09
1460197_a_at	Steap4	0.00234878	0.28	0.49	1.65
1415849_s_at	Stmn1	4.62168e-06	-0.65	1.19	1.28
1448366_at	Stx1a	0.000102757	0.01	-0.46	-1.65
1426511_at	Susd2	0.00558246	0.22	-0.08	-1.07
1437387_at	Susd5	0.00227805	0.19	-0.44	-1.52
1438636_s_at	Susd5	0.00414669	0.17	-0.26	-1.29
1437424_at	Syde2	0.00198982	0.04	-0.76	-1.62
1419289_a_at	Syngr1	2.38069e-05	0.08	2.27	3.54
1436333_a_at	Synj1	0.0013217	0.23	0.14	1.17
1435399_at	Synpo2	0.00830337	0.04	-0.24	-1.1
1441206_at	Synpo2	0.00135821	0.87	-0.52	-1
1447657_s_at	Synpo2l	0.00345716	-0.08	-0.33	-1.66
1416996_at	Tbc1d8	0.00626362	3.1	0.4	0.35
1419344_at	Tcte1	0.0017865	0.16	-1.22	-0.86
1418196_at	Tep1	0.000703491	-0.07	0.59	2.41
1452661_at	Tfrc	0.000298896	-0.16	1.16	0.94
1418136_at	Tgfb1i1	0.00261574	0.02	-0.3	-1.03
1422286_a_at	Tgif1	0.00163835	1.05	0.62	1.98
1421811_at	Thbs1	0.00152347	-0.02	1.59	1.99
1460302_at	Thbs1	0.000111482	-0.01	1.92	2.42
1455262_at	Thsd4	0.00174011	-0.18	-0.57	-1.72
1455456_a_at	Timm50	0.00129382	-0.55	-0.87	2.23
1460227_at	Timp1	9.14111e-05	-0.32	2.55	2.77
1452160_at	Tiparp	0.000187141	0.1	0.46	1.05
1436042_at	Tln1	0.000566898	0.35	-0.34	-1.31
1419132_at	Tlr2	0.000977682	0.14	0.99	1.38
1424573_at	Tmed5	0.00270582	-0.07	0.36	1.06
1424574_at	Tmed5	0.00110823	0.07	0.05	1.05
1425025_at	Tmem106a	0.00173835	0.01	1.36	2.04
1438693_at	Tmem110	0.00351081	0.12	-0.51	-1.24
1457701_at	Tmem136	0.0016979	0.28	-0.46	-1.72
1436556_at	Tmem139	0.00242209	1.51	-1.5	-0.45
1437245_at	Tmem154	0.00387845	0.2	0.31	2.49
1425603_at	Tmem176a	0.000673361	-0.07	1.1	1.57
1418004_a_at	Tmem176b	9.53021e-05	-0.06	1.01	1.18
1424411_at	Tmem189	0.00607044	0.1	0.36	1.34
1451341_s_at	Tmem189	0.00690651	0.2	0.73	1.71
1436698_x_at	Tmem204	0.00674687	-0.11	-0.14	-1.23
1417030_at	Tmem206	0.000586417	-0.28	0.25	1.26
1443619_at	Tmem30a	0.000810272	0.06	1.84	0.44
1420514_at	Tmem47	0.00236546	0.14	-0.32	-1
1449885_at	Tmem47	0.00240294	-0.04	-0.34	-1.21
1440894_at	Tmtc3	0.00118439	0.22	0.21	-1.04
1438855_x_at	Tnfaip2	0.000197233	-0.15	1.99	2.79
1433699_at	Tnfaip3	0.00191695	0.00576566	0.71	1.49
1449033_at	Tnfrsf11b	0.00584097	0.4	1.57	1.7
1418099_at	Tnfrsf1b	0.00270203	0.47	1.46	2.11
1418345_at	Tnfsf13	0.000533429	0.09	1.11	2.01
1455256_at	Tnik	0.00139883	0.05	-0.44	-1.15
1431188_a_at	Tom1	2.9034e-05	-0.18	0.44	1.12
1454694_a_at	Top2a	7.78787e-05	-0.57	2.44	1.89
1423049_a_at	Tpm1	0.00172514	0.11	-0.23	-1.26
1419739_at	Tpm2	0.00101862	-0.09	-0.59	-1.38
1449577_x_at	Tpm2	0.000237784	0.2	-1.11	-0.18
1427567_a_at	Tpm3	0.00137463	-0.19	1.21	1.15
1436958_x_at	Tpm3	0.000179073	-0.15	0.69	1.07
1452622_a_at	Tradd	0.00132993	-1.28	0.56	0.52
1419879_s_at	Trim25	0.00221083	-0.06	0.92	1.18
1425974_a_at	Trim25	0.00073653	-0.26	0.83	1
1451860_a_at	Trim30	0.00518663	0.00693557	1.2	1.18
1416118_at	Trim59	0.00064628	-0.53	0.97	1.6
1451158_at	Trip12	0.00391392	0.14	2.08	0.21
1421096_at	Trpc1	0.00348684	-0.05	-0.17	-1.56
1457445_at	Trps1	0.00213347	-0.26	0.53	1.09
1456014_s_at	Trpt1	0.00261933	0.05	1.58	1.86
1435118_at	Tsen2	0.00144747	0.25	-0.04	1.38
1418643_at	Tspan13	0.0024951	-0.29	0.48	1.31
1460239_at	Tspan13	0.00605081	0.09	0.66	1.89
1423924_s_at	Tspan14	4.04711e-05	-0.68	0.77	1.18
1424567_at	Tspan2	0.00190321	0.21	-0.28	-1.1
1424568_at	Tspan2	0.00160836	0.19	-0.27	-1.07
1435456_at	Ttc28	0.00149471	0.14	0.07	-1.17
1449520_at	Ttc28	0.0046285	0.05	-0.14	-1.12
1455377_at	Ttll7	0.00718951	-0.06	-0.55	-1.21
1428457_at	Ttpal	0.00819446	-0.07	0.06	1.13
1420925_at	Tub	0.00156988	0.03	-0.69	-2.13
1444214_at	Tubb1	0.00241189	0.51	-0.28	-1.12
1431292_a_at	Twf2	0.0015153	0.17	0.69	1.72
1448925_at	Twist2	0.0052966	-0.15	-0.49	-1.3
1450792_at	Tyrobp	0.000171905	0.05	2.52	2.54
1436890_at	Uap1l1	0.000112071	0.02	0.41	1.41
1452149_at	Ube3b	0.0013468	-0.14	0.66	1.25
1448188_at	Ucp2	0.000541001	-0.08	1.72	2.52
1426261_s_at	Ugt1a6a	0.0014025	-0.15	1	1.59
1455912_x_at	Unc45a	0.00765901	0.45	-0.64	-1.62
1419592_at	Unc5c	0.000252511	-0.4	-0.12	-1.67
1418191_at	Usp18	0.00275724	0.11	1.36	0.5
1458899_at	Usp53	0.000244976	-0.45	0.3	-1.42
1458501_at	Vapb	0.00584622	0.19	-0.29	-1.24
1415989_at	Vcam1	4.46264e-05	-0.46	1.72	1.8
1436003_at	Vcam1	5.41783e-05	0.05	3.09	2.55
1448162_at	Vcam1	2.14861e-05	-0.56	1.93	1.61
1451314_a_at	Vcam1	2.4754e-05	0.08	2.89	2.93
1416157_at	Vcl	0.00325719	0.04	-0.21	-1.08
1435893_at	Vldlr	0.00189625	0.09	-0.62	-1.21
1431335_a_at	Wfdc1	0.00127066	-0.02	-0.41	-1.58
1448593_at	Wisp1	7.48352e-05	0.22	3.08	1.73
1444050_at	Wisp3	0.00308502	0.39	-0.81	-1.46
1436791_at	Wnt5a	0.00121059	0.04	-0.38	-1.9
1451006_at	Xdh	0.00131312	0.15	0.74	1.44
1449347_a_at	Xlr4b	0.00143246	0.01	0.88	2.59
1430134_a_at	Yars2	0.00393743	0.35	-0.49	1.34
1458504_at	Zc3h12d	0.00130397	0.47	0.93	1.4
1455413_at	Zfp11	0.00442317	0.66	-0.21	-1.56
1437212_at	Zfp420	0.00420578	-0.66	-1.83	-1.87
1435360_at	Zfp651	0.00666001	0.06	-0.33	-1
1434504_at	Zfyve28	0.00814486	0.35	-0.18	-1.03
1439077_at	Zxda	0.00233882	0.37	-0.46	-1.16

## Sheet: Sup Table 2 KEGG Pathways
KEGG ID/Gene Name	KEGG Pathway/Gene Description	Class	KEGG term p-value	Enrichment	Fold Change 6 weeks	Fold Change 32 weeks	Fold Change 78 weeks
04060	Cytokine-cytokine receptor interaction - Mus musculus (mouse)	Environmental Information Processing; Signaling Molecules and Interaction	3.84971e-11	25/221
Ccl6	chemokine (C-C motif) ligand 6				-0.14	2.32	2.3
Cxcr4	chemokine (C-X-C motif) receptor 4				-0.13	2.96	4.17
Ccl7	chemokine (C-C motif) ligand 7				-0.98	1.59	4.42
Il10rb	interleukin 10 receptor, beta				-0.04	1.01	2.01
Ccl8	chemokine (C-C motif) ligand 8				0.33	2.92	3.01
Tnfrsf11b	tumor necrosis factor receptor superfamily, member 11b (osteoprotegerin)				0.4	1.57	1.7
Ccr5	chemokine (C-C motif) receptor 5				0.28	3.34	2.76
Il2rg	interleukin 2 receptor, gamma chain				0.05	1.45	2.36
Tnfrsf1b	tumor necrosis factor receptor superfamily, member 1b				0.47	1.46	2.11
Il7r	interleukin 7 receptor				0.63	3.77	4.61
Csf1r	colony stimulating factor 1 receptor				0.12	1.12	1.65
Lepr	leptin receptor				0.46	-0.8	-1.68
Ccl19	chemokine (C-C motif) ligand 19				-0.71	1.07	1.64
Csf2ra	colony stimulating factor 2 receptor, alpha, low-affinity (granulocyte-macrophage)				0.13	2.73	3.17
Cx3cl1	chemokine (C-X3-C motif) ligand 1				0.18	1.71	1.87
Ccl9	chemokine (C-C motif) ligand 9				-0.46	1.74	2.19
Kitl	kit ligand				-0.43	0.06	-1.09
Cxcl12	chemokine (C-X-C motif) ligand 12				-0.34	1.1	1.95
Cxcl16	chemokine (C-X-C motif) ligand 16				-0.56	3.18	3.56
Pdgfc	platelet-derived growth factor, C polypeptide				-0.14	0.48	1.06
Ifnar2	interferon (alpha and beta) receptor 2				0.32	1.83	1.58
Il13ra1	interleukin 13 receptor, alpha 1				-0.41	1.76	2.77
Pdgfd	platelet-derived growth factor, D polypeptide				-0.11	-0.17	-1.18
Cxcl1	chemokine (C-X-C motif) ligand 1				-0.46	1.77	2.66
Osmr	oncostatin M receptor				0.02	0.9	1.05
04510	Focal adhesion - Mus musculus (mouse)	Cellular Processes; Cell Communication	5.11501e-11	21/191
Lamb1-1	laminin B1 subunit 1				-0.31	0.78	1.24
Itga6	integrin alpha 6				-0.54	1.19	2.5
Col5a2	collagen, type V, alpha 2				-0.16	0.66	1.15
Braf	Braf transforming gene				-0.04	0.03	-1.33
Prkcb	protein kinase C, beta				-0.01	1.93	1.8
Col4a4	collagen, type IV, alpha 4				0.32	-0.39	-1.74
Lamc3	laminin gamma 3				0.06	-0.31	-1.58
Thbs1	thrombospondin 1				-0.02	1.59	1.99
Col1a1	collagen, type I, alpha 1				0.02	0.57	1.01
Col4a6	collagen, type IV, alpha 6				0.05	-0.34	-1.36
Ccnd1	cyclin D1				-0.01	0.67	1.07
Lama4	laminin, alpha 4				-0.48	-0.42	-1.03
Pik3cg	phosphoinositide-3-kinase, catalytic, gamma polypeptide				0.38	1.29	1.27
Col3a1	collagen, type III, alpha 1				-0.08	0.74	1.03
Mylk	myosin, light polypeptide kinase				0.15	-0.25	-1.99
Rac2	RAS-related C3 botulinum substrate 2				0.31	1.84	2.84
Pdgfc	platelet-derived growth factor, C polypeptide				-0.14	0.48	1.06
Tln1	talin 1				0.35	-0.34	-1.31
Pdgfd	platelet-derived growth factor, D polypeptide				-0.11	-0.17	-1.18
Vcl	vinculin				0.04	-0.21	-1.08
Igf1	insulin-like growth factor 1				-0.23	0.77	1.39
05200	Pathways in cancer - Mus musculus (mouse)	Human Diseases; Cancers	1.53216e-10	32/292
Mmp2	matrix metallopeptidase 2				0.00762	0.51	1.15
Fzd2	frizzled homolog 2 (Drosophila)				0.34	-0.4	-1.07
Stat1	signal transducer and activator of transcription 1				-0.02	0.27	2.09
Cdk6	cyclin-dependent kinase 6				-0.35	0.24	1.37
Plcg2	phospholipase C, gamma 2				0.11	1.15	0.94
Rassf5	Ras association (RalGDS/AF-6) domain family member 5				-0.2	0.49	1
Cblb	Casitas B-lineage lymphoma b				0.2	0.34	1.36
Lamb1-1	laminin B1 subunit 1				-0.31	0.78	1.24
Itga6	integrin alpha 6				-0.54	1.19	2.5
Fgfr3	fibroblast growth factor receptor 3				-1.13	0.28	-0.26
Tpm3	tropomyosin 3, gamma				-0.19	1.21	1.15
Chuk	conserved helix-loop-helix ubiquitous kinase				0.08	0.15	1.14
Fgfr2	fibroblast growth factor receptor 2				0.15	-0.39	-1.05
Braf	Braf transforming gene				-0.04	0.03	-1.33
Ptgs2	prostaglandin-endoperoxide synthase 2				-0.27	1.76	1.7
Fgf1	fibroblast growth factor 1				0.17	-0.42	-1.32
Col4a4	collagen, type IV, alpha 4				0.32	-0.39	-1.74
Lamc3	laminin gamma 3				0.06	-0.31	-1.58
Csf1r	colony stimulating factor 1 receptor				0.12	1.12	1.65
Col4a6	collagen, type IV, alpha 6				0.05	-0.34	-1.36
Csf2ra	colony stimulating factor 2 receptor, alpha, low-affinity (granulocyte-macrophage)				0.13	2.73	3.17
Sfpi1	SFFV proviral integration 1				0.28	1.41	1.89
Kitl	kit ligand				-0.43	0.06	-1.09
Ccnd1	cyclin D1				-0.01	0.67	1.07
Lama4	laminin, alpha 4				-0.48	-0.42	-1.03
Dapk2	death-associated protein kinase 2				0.49	-0.55	-1.5
Cebpa	CCAAT/enhancer binding protein (C/EBP), alpha				-0.3	0.21	1.77
Rac2	RAS-related C3 botulinum substrate 2				0.31	1.84	2.84
Fgf13	fibroblast growth factor 13				0.2	-0.4	-1.73
Wnt5a	wingless-related MMTV integration site 5A				0.04	-0.38	-1.9
Ptch2	patched homolog 2				0.5	-0.47	-1.34
Igf1	insulin-like growth factor 1				-0.23	0.77	1.39
04810	Regulation of actin cytoskeleton - Mus musculus (mouse)	Cellular Processes; Cell Motility	3.74779e-09	18/188
Itga6	integrin alpha 6				-0.54	1.19	2.5
Fgfr3	fibroblast growth factor receptor 3				-1.13	0.28	-0.26
Cd14	CD14 antigen				-0.14	1.52	2.44
Gna13	guanine nucleotide binding protein, alpha 13				-0.19	0.81	1.34
Fgfr2	fibroblast growth factor receptor 2				0.15	-0.39	-1.05
Braf	Braf transforming gene				-0.04	0.03	-1.33
Fgf1	fibroblast growth factor 1				0.17	-0.42	-1.32
Mylk	myosin, light polypeptide kinase				0.15	-0.25	-1.99
Rac2	RAS-related C3 botulinum substrate 2				0.31	1.84	2.84
Ezr	ezrin				0.21	0.8	1.05
Pdgfc	platelet-derived growth factor, C polypeptide				-0.14	0.48	1.06
Cyfip2	cytoplasmic FMR1 interacting protein 2				0.53	1.01	1.55
Fgf13	fibroblast growth factor 13				0.2	-0.4	-1.73
Pdgfd	platelet-derived growth factor, D polypeptide				-0.11	-0.17	-1.18
Vcl	vinculin				0.04	-0.21	-1.08
Enah	enabled homolog (Drosophila)				-0.33	-0.49	-2.07
Arpc3	actin related protein 2/3 complex, subunit 3				-0.02	0.47	1.06
Fgd3	FYVE, RhoGEF and PH domain containing 3				0.57	0.08	-1.1
04020	Calcium signaling pathway - Mus musculus (mouse)	Environmental Information Processing; Signal Transduction	4.58785e-09	17/170
Ryr2	ryanodine receptor 2, cardiac				0.5	-1.02	-1.54
Prkx	protein kinase, X-linked				-1.05	0.84	1.02
Pde1a	phosphodiesterase 1A, calmodulin-dependent				-0.28	0.93	1.14
Ptger3	prostaglandin E receptor 3 (subtype EP3)				1	-0.64	-0.26
Itpr1	inositol 1,4,5-triphosphate receptor 1				-0.00524	-0.26	-1.07
Atp2b1	ATPase, Ca++ transporting, plasma membrane 1				-0.07	0.4	1.59
Plcg2	phospholipase C, gamma 2				0.11	1.15	0.94
P2rx4	purinergic receptor P2X, ligand-gated ion channel 4				0.16	1.12	1.94
P2rx1	purinergic receptor P2X, ligand-gated ion channel, 1				-0.17	0.08	-1.74
Prkcb	protein kinase C, beta				-0.01	1.93	1.8
P2rx7	purinergic receptor P2X, ligand-gated ion channel, 7				0.02	0.61	1.84
Pln	phospholamban				0.08	0.07	-1.01
Sphk1	sphingosine kinase 1				-0.25	1.11	1.36
Atp2a2	ATPase, Ca++ transporting, cardiac muscle, slow twitch 2				-0.01	-0.29	-1.05
Mylk	myosin, light polypeptide kinase				0.15	-0.25	-1.99
Trpc1	transient receptor potential cation channel, subfamily C, member 1				-0.05	-0.17	-1.56
Prkaca	protein kinase, cAMP dependent, catalytic, alpha				-0.02	-0.06	-1.05
04144	Endocytosis - Mus musculus (mouse)	Cellular Processes; Transport and Catabolism	9.35615e-08	16/184
Ddef2	development and differentiation enhancing factor 2				0.21	-0.17	-1.29
Sh3kbp1	SH3-domain kinase binding protein 1				-0.34	0.24	3.09
Cxcr4	chemokine (C-X-C motif) receptor 4				-0.13	2.96	4.17
Rab5b	RAB5B, member RAS oncogene family				0.95	3.11	1.13
Cblb	Casitas B-lineage lymphoma b				0.2	0.34	1.36
Fgfr3	fibroblast growth factor receptor 3				-1.13	0.28	-0.26
Rab5c	RAB5C, member RAS oncogene family				-0.23	0.82	2.31
Fgfr2	fibroblast growth factor receptor 2				0.15	-0.39	-1.05
Ccr5	chemokine (C-C motif) receptor 5				0.28	3.34	2.76
Il2rg	interleukin 2 receptor, gamma chain				0.05	1.45	2.36
Arrb2	arrestin, beta 2				0.25	1.16	2.23
Csf1r	colony stimulating factor 1 receptor				0.12	1.12	1.65
Tfrc	transferrin receptor				-0.16	1.16	0.94
Chmp4c	chromatin modifying protein 4C				0.06	-0.43	-1.86
Rab31	RAB31, member RAS oncogene family				-0.09	0.94	1.19
Adrbk1	adrenergic receptor kinase, beta 1				0.16	0.5	1.1
04010	MAPK signaling pathway - Mus musculus (mouse)	Environmental Information Processing; Signal Transduction	7.04352e-07	18/261
Gadd45b	growth arrest and DNA-damage-inducible 45 beta				-0.46	0.43	1.74
Prkx	protein kinase, X-linked				-1.05	0.84	1.02
Fgfr3	fibroblast growth factor receptor 3				-1.13	0.28	-0.26
Cd14	CD14 antigen				-0.14	1.52	2.44
Chuk	conserved helix-loop-helix ubiquitous kinase				0.08	0.15	1.14
Fgfr2	fibroblast growth factor receptor 2				0.15	-0.39	-1.05
Braf	Braf transforming gene				-0.04	0.03	-1.33
Ntf3	neurotrophin 3				0.05	-0.46	-1.52
Prkcb	protein kinase C, beta				-0.01	1.93	1.8
Fgf1	fibroblast growth factor 1				0.17	-0.42	-1.32
Arrb2	arrestin, beta 2				0.25	1.16	2.23
Pla2g6	phospholipase A2, group VI				1.51	-0.17	0.77
Gadd45g	growth arrest and DNA-damage-inducible 45 gamma				-0.49	-0.16	1.04
Rac2	RAS-related C3 botulinum substrate 2				0.31	1.84	2.84
Stmn1	stathmin 1				-0.65	1.19	1.28
Prkaca	protein kinase, cAMP dependent, catalytic, alpha				-0.02	-0.06	-1.05
Fgf13	fibroblast growth factor 13				0.2	-0.4	-1.73
Rps6ka5	ribosomal protein S6 kinase, polypeptide 5				0.07	0.29	-1.25
01100	Metabolic pathways - Mus musculus (mouse)	-	3.0508e-05	38/1016
Man1c1	mannosidase, alpha, class 1C, member 1				-0.24	1.67	1.62
Cbr2	carbonyl reductase 2				0.05	-0.19	-1.04
Atp6v0a1	ATPase, H+ transporting, lysosomal V0 subunit A1				0.45	2.6	0.39
Galk2	galactokinase 2				-0.04	0.71	1.78
Atp6v1c1	ATPase, H+ transporting, lysosomal V1 subunit C1				0.09	0.59	1.08
Man1a	mannosidase 1, alpha				-0.00777	0.63	1.37
Plcg2	phospholipase C, gamma 2				0.11	1.15	0.94
Galns	galactosamine (N-acetyl)-6-sulfate sulfatase				-0.32	1.6	1.69
Sgpl1	sphingosine phosphate lyase 1				0.01	0.88	1.68
Pgd	phosphogluconate dehydrogenase				8.44e-05	-0.00308	1.38
Gch1	GTP cyclohydrolase 1				-0.14	1.11	1.11
Synj1	synaptojanin 1				0.23	0.14	1.17
Gne	glucosamine				-0.15	-0.33	-1.08
Pla2g6	phospholipase A2, group VI				1.51	-0.17	0.77
Gda	guanine deaminase				-0.2	1.01	1.68
Asns	asparagine synthetase				1.08	0.37	2.31
Hexa	hexosaminidase A				-0.13	0.58	1.12
Enpp3	ectonucleotide pyrophosphatase/phosphodiesterase 3				0.24	-0.000913	-1.28
Alpi	alkaline phosphatase, intestinal				0.97	-0.28	-1.61
Mthfd2	methylenetetrahydrofolate dehydrogenase (NAD+ dependent), methenyltetrahydrofolate cyclohydrolase				-0.95	0.26	1.21
Gmds	GDP-mannose 4, 6-dehydratase				0.04	0.13	1.27
Sphk1	sphingosine kinase 1				-0.25	1.11	1.36
Hexb	hexosaminidase B				-0.04	0.67	1
Phgdh	3-phosphoglycerate dehydrogenase				-0.16	-0.05	1.57
Xdh	xanthine dehydrogenase				0.15	0.74	1.44
Dgkb	diacylglycerol kinase, beta				0.22	0.03	-1.02
Naglu	alpha-N-acetylglucosaminidase (Sanfilippo disease IIIB)				-0.22	0.84	1.53
Enpp1	ectonucleotide pyrophosphatase/phosphodiesterase 1				0.14	0.37	1.08
Gusb	glucuronidase, beta				-0.14	2.11	1.91
Rrm2	ribonucleotide reductase M2				-0.66	1.62	1.55
Atp6v1b2	ATPase, H+ transporting, lysosomal V1 subunit B2				-0.25	1.55	2.22
Galnt7	UDP-N-acetyl-alpha-D-galactosamine: polypeptide N-acetylgalactosaminyltransferase 7				0.00857	0.89	1.55
Aoc3	amine oxidase, copper containing 3				0.08	-0.04	-1.12
Atp6v0e2	ATPase, H+ transporting, lysosomal V0 subunit E2				-0.28	0.44	-1.58
Galc	galactosylceramidase				0.04	1.03	2.29
St3gal1	ST3 beta-galactoside alpha-2,3-sialyltransferase 1				0.29	0.56	1.29
Psat1	phosphoserine aminotransferase 1				-0.75	0.25	1.11
Adh7	alcohol dehydrogenase 7 (class IV), mu or sigma polypeptide				-0.44	0.16	-1.38
04080	Neuroactive ligand-receptor interaction - Mus musculus (mouse)	Environmental Information Processing; Signaling Molecules and Interaction	0.000109933	13/225
S1pr2	sphingosine-1-phosphate receptor 2				-0.06	1.06	1.38
Ptger3	prostaglandin E receptor 3 (subtype EP3)				1	-0.64	-0.26
Gria4	glutamate receptor, ionotropic, AMPA4 (alpha 4)				0.06	-0.01	-1.27
P2rx4	purinergic receptor P2X, ligand-gated ion channel 4				0.16	1.12	1.94
P2rx1	purinergic receptor P2X, ligand-gated ion channel, 1				-0.17	0.08	-1.74
Crhr2	corticotropin releasing hormone receptor 2				0.22	-0.18	-1.26
C3ar1	complement component 3a receptor 1				0.06	3.45	3.95
Lepr	leptin receptor				0.46	-0.8	-1.68
P2rx7	purinergic receptor P2X, ligand-gated ion channel, 7				0.02	0.61	1.84
Adora1	adenosine A1 receptor				-1.28	-0.4	0.82
C5ar1	complement component 5a receptor 1				-0.33	1.45	1.63
Gria3	glutamate receptor, ionotropic, AMPA3 (alpha 3)				-0.48	-0.05	-2.52
Adra2a	adrenergic receptor, alpha 2a				0.15	-0.04	-1.26
